# Supplementary material for: Design, synthesis and photophysical properties of 8-hydroxyquinoline-functionalized tripodal molecular switch as a highly selective sequential pH sensor in aqueous solution
Source: Royal Society of Chemistry journal article supplement (doi:10.1039/c4ra16345a), 2015-01-01
Supplement: c4ra16345a1.pdf [file c4ra16345a1.pdf]

## Appendix A

### Supplementary Information

#### **Design, synthesis and photophysical properties of 8-hydroxyquinoline-functionalized tripodal molecular switch as a highly selective sequential pH sensor in aqueous solution**

*Rifat Akbar<sup>1</sup>, Minati Baral<sup>2</sup> and B K Kanungo<sup>1\*</sup>*

<sup>1</sup> Department of Chemistry, Sant Longowal Institute of Engineering & Technology, Longowal, Punjab-148106, India

<sup>2</sup>Department of Chemistry, National Institute of Technology Kurukh, Haryana-136119, India

[b.kanungo@gmail.com](mailto:b.kanungo@gmail.com)

#### **Experimental**

Synthesis of 1,1,1 Tris (aminomethyl)ethane (TAME)

The synthesis of 1,1,1 Tris (aminomethyl)ethane (TAME) **1c** was carried out under multistep reactions as detailed below:

##### **1.1 1,1,1-tris[(4-tolylsulfonyl)methyl]ethane (**1a**)**

1,1,1-Tris(hydroxymethyl)ethane (10 g, 0.083 mol) was dissolved in THF (45 mL) and added to 70 ml of aqueous solution of NaOH (16.66 g, 0.41 mol). The solution was cooled in an ice–water bath and THF solution of tosyl chloride (47.66 g, 0.25 mol) was added dropwise with stirring for about 2 hours. During addition, the solution became pale yellow while an off–white slurry appeared progressively; the mixture was stirred for 4 hrs further at 0°C. The reaction mixture was poured into ice water (250 mL) and extracted with toluene (3×100 mL). The combined organic phases were washed with water (2×100 mL), dried over anhydrous MgSO<sub>4</sub>, and concentrated on rotary evaporator. The thick jelly residue was poured into methanol (500 mL) with stirring. The resulting suspension was filtered on a Buchner funnel and the precipitate was washed with water followed by methanol and diethyl ether, and dried under vacuum. The pure product was isolated as a white solid after recrystallization from

n-propanol. Yield: 87%, mp: 105°C. FTIR (KBr): 3023, 2954, 1889, 1686, 1605, 1478, 1458, 1367, 1302, 1290, 1153, 1099, 1012, 991, 941, 882, 805, 797, 701, 677, 532, 498 cm<sup>-1</sup>.

### 1.2 1,1,1-tris(azidomethyl)ethane (**1b**)

Solution of 1,1,1-tris[(4-tolylsulfonyl)methyl]ethane (**1a**) (25.0 g, 42.76 mmol) and sodium azide (29.58 g, 357.17 mmol) in dry DMSO (250 mL) was stirred under N<sub>2</sub> atmosphere at 125°C for 8 hrs. The reaction mixture was poured into cold water (1.5 L), after cooling to room temperature. The aqueous solution was extracted with ethyl acetate (3×250 mL). The organic phases were washed with water (2×100 mL), dried over anhydrous NaSO<sub>4</sub> and reduced on a rotary evaporator. The residual oil shows strong absorption band at 2123 cm<sup>-1</sup> in the infrared spectrum which confirms the presence of an azide and the product was used readily for the next step.

### 1.3 1,1,1-tris(aminomethyl)ethane (**1c**)

1,1,1-tris(azidomethyl)ethane (**1b**) (21g, 107.69 mmol) in freshly distilled THF(60 mL) was added to a vigorously stirred mixture of LiAlH<sub>4</sub> (18.63g 374.39mmol) in dry THF(300 mL) over a period of 3h under dry nitrogen. After complete addition, the mixture was refluxed for 12h, cooled, followed by addition of water (22 mL), then by NaOH (34mL of 15% aqueous solution) and again with water (50mL). The resulting slurry was stirred for 25 min and filtered through sintered glass G4 funnel under vacuum. The white residue was further refluxed over night with THF to extract remaining product. The solvent was removed from all combined filtrates to give pale yellow oil. The crude product was taken up in super dry EtOH (300mL) and concentrated HCl (12mL) was added dropwise to precipitate the compound as the trihydrochloride salt. The pure product was reprecipitated from an ethanol solution to yield a fine white powder. Yield:9.1g, 77.77mmol (72.22%), decomposes at ≥ 250°C. <sup>1</sup>HNMR (D<sub>2</sub>O) (δ): 3.24(s, 6H, 3CH<sub>2</sub>) 1.20 (s, 3H ,CH<sub>3</sub>).

## 2. 8-hydroxyquinoline-5-methylchloride hydrochloride (**2a**)

Dry hydrogen chloride gas was passed through a solution of 8-hydroxyquinoline **2** (14.51 g, 0.1 mol) and formaldehyde (20 mL, 40%) in 37% hydrochloric acid (50 mL) for 5 hours at 60°C. After filtration, the yellow solid product was washed several times with acetone and dried in vacuo to afford **2a** (14.01 g) in 96.5% yield. m.p. 281°C; <sup>1</sup>H NMR (300 MHz, D<sub>2</sub>O, 25°C, TMS): δ = 8.81 (d, <sup>3</sup>J<sub>H,H</sub> = 4.1 Hz, 1H, Ar-H), 8.51 (d, <sup>3</sup>J<sub>H,H</sub> = 8.5 Hz, 1H, Ar-H), 7.59 (dd, <sup>3</sup>J<sub>H,H</sub> = 8.2 Hz, <sup>3</sup>J<sub>H,H</sub> = 4.1 Hz, 1H, Ar-H), 7.40 (d, <sup>3</sup>J<sub>H,H</sub> = 7.8 Hz, 1H, Ar-H), 7.01 (d, <sup>3</sup>J<sub>H,H</sub> = 7.8 Hz, 1H, Ar-H), 4.82 (s, 2H, ArCH<sub>2</sub>Cl) ppm. IR (ATR) ν(cm<sup>-1</sup>) = 3032, 2731, 1564, 1510, 1439, 1330, 1006. Elemental Analysis calcd (%) for C<sub>10</sub>H<sub>9</sub>NOCl<sub>2</sub>: 52.20 C, 3.94 H, 6.09 N; found: 52.29 C, 3.89 H, 6.13 N; MS (ES<sup>+</sup>), m/z (I,%) = 320.07[M+1]<sup>+</sup>(90).

**Table S1:** Cartesian (X, Y, Z) coordinates of minimized structure of [(LH<sub>9</sub>)<sup>+6</sup> species of 5,5'-(2(((8-hydroxyquinolin-5-yl)methylamino)methyl)2-methylpropane-1,3-diyl)bis(azanediy)-bis - (methylene)diquinolin-8-ol, (TAME5OX)].

XYZ file of LH<sub>9</sub>: coordinates in Angstrom

|   |               |               |               |
|---|---------------|---------------|---------------|
| C | 0.8875000000  | -2.3305760000 | -0.7017980000 |
| C | 1.9506970000  | -2.4082620000 | 0.4304770000  |
| C | -0.4764800000 | -2.6676250000 | -0.0261170000 |
| C | 0.8287260000  | -0.9141280000 | -1.3547580000 |
| C | 1.2246570000  | -3.3667650000 | -1.8011370000 |
| N | -1.5117650000 | -3.1109100000 | -0.9711310000 |
| N | 3.2522170000  | -1.8195860000 | 0.0699120000  |
| N | 1.1532650000  | 0.1636230000  | -0.4062600000 |
| C | 0.9924430000  | 1.5369250000  | -0.9224280000 |
| C | 4.3238190000  | -2.0347720000 | 1.0650250000  |
| C | -2.8590890000 | -3.3003290000 | -0.4028760000 |
| C | 5.6232300000  | -1.3843060000 | 0.6440860000  |
| C | -0.4354900000 | 2.0498150000  | -0.9387440000 |
| C | -3.7618250000 | -2.0797020000 | -0.5316520000 |
| C | -3.4810870000 | -1.0989190000 | -1.4629850000 |
| C | -4.2996610000 | 0.0406100000  | -1.6183020000 |
| C | -5.4140560000 | 0.2316760000  | -0.8213580000 |
| C | -4.9451580000 | -1.9416540000 | 0.2666730000  |
| C | -5.7798860000 | -0.7751480000 | 0.1284500000  |
| N | -6.9113040000 | -0.5897080000 | 0.8797940000  |
| C | -7.2603840000 | -1.5262500000 | 1.7563850000  |
| C | -6.5170620000 | -2.7141860000 | 1.9570910000  |
| C | -5.3696940000 | -2.9154860000 | 1.2167690000  |
| C | 6.6771000000  | -2.1627680000 | 0.1982040000  |
| C | 7.9012990000  | -1.5972320000 | -0.2279810000 |
| C | 8.0837080000  | -0.2275340000 | -0.2112320000 |
| C | 5.7932790000  | 0.0403350000  | 0.6716860000  |
| C | 7.0308930000  | 0.6286970000  | 0.2436860000  |
| N | 7.2469080000  | 1.9821880000  | 0.2564950000  |
| C | 6.2737980000  | 2.7785640000  | 0.6875990000  |
| C | 5.0205340000  | 2.2961350000  | 1.1390970000  |
| C | 4.7845580000  | 0.9366210000  | 1.1273650000  |
| C | -3.0670660000 | 3.1214680000  | -1.0447330000 |
| C | -2.3179780000 | 3.0327250000  | -2.1949630000 |
| C | -1.0049570000 | 2.4986610000  | -2.1216740000 |
| C | -2.5163560000 | 2.7127150000  | 0.2039500000  |
| C | -1.2068270000 | 2.1536390000  | 0.2675280000  |
| C | -0.7659610000 | 1.7423580000  | 1.5579770000  |
| C | -1.5908690000 | 1.9140960000  | 2.6551120000  |
| C | -2.8727070000 | 2.4933550000  | 2.4864960000  |
| N | -3.3262650000 | 2.8780420000  | 1.2963340000  |
| O | -4.3850420000 | 3.5542450000  | -1.0435370000 |
| O | 9.2552930000  | 0.3799380000  | -0.6155950000 |
| O | -6.2014930000 | 1.3589920000  | -0.9055540000 |
| H | 1.5755990000  | -1.8600500000 | 1.3038410000  |

|   |               |               |               |
|---|---------------|---------------|---------------|
| H | 2.0477190000  | -3.4689820000 | 0.7342430000  |
| H | -0.3041910000 | -3.4280680000 | 0.7638830000  |
| H | -0.8355750000 | -1.7621390000 | 0.4761120000  |
| H | 1.5091420000  | -0.8892570000 | -2.2298650000 |
| H | -0.1840160000 | -0.7603950000 | -1.7424020000 |
| H | 2.2347110000  | -3.2118510000 | -2.1991480000 |
| H | 1.1756380000  | -4.3920470000 | -1.4116680000 |
| H | 0.5314440000  | -3.2781260000 | -2.6443410000 |
| H | 1.6015140000  | 2.1845470000  | -0.2761870000 |
| H | 1.4056950000  | 1.6458930000  | -1.9433600000 |
| H | 3.9704370000  | -1.6210530000 | 2.0190870000  |
| H | 4.5051610000  | -3.1101610000 | 1.2478560000  |
| H | -3.3226920000 | -4.1501440000 | -0.9255830000 |
| H | -2.7886380000 | -3.6014350000 | 0.6573210000  |
| H | -2.5967880000 | -1.2179870000 | -2.0775130000 |
| H | -4.0368070000 | 0.7857390000  | -2.3605140000 |
| H | -8.1651550000 | -1.3401810000 | 2.3281390000  |
| H | -6.8524730000 | -3.4484850000 | 2.6819020000  |
| H | -4.7919360000 | -3.8224180000 | 1.3540310000  |
| H | 6.5691910000  | -3.2435170000 | 0.1770980000  |
| H | 8.7016900000  | -2.2484450000 | -0.5686610000 |
| H | 6.4836360000  | 3.8439430000  | 0.6820260000  |
| H | 4.2664050000  | 2.9935180000  | 1.4875310000  |
| H | 3.8327880000  | 0.5410830000  | 1.4599870000  |
| H | -2.7362760000 | 3.3544540000  | -3.1412640000 |
| H | -0.4239140000 | 2.4373860000  | -3.0373580000 |
| H | 0.1983350000  | 1.2602710000  | 1.6518710000  |
| H | -1.2725620000 | 1.6026700000  | 3.6437660000  |
| H | -3.5359180000 | 2.6364500000  | 3.3330500000  |
| H | -4.6635650000 | 3.5915350000  | -0.0895680000 |
| H | 9.9140440000  | -0.2819630000 | -0.9039460000 |
| H | -5.7244100000 | 2.0911280000  | -1.3603120000 |
| H | 3.5639070000  | -2.0811430000 | -0.8635820000 |
| H | -1.2189880000 | -3.9241700000 | -1.5018910000 |
| H | 2.1072620000  | 0.0075680000  | -0.0734180000 |
| H | 8.5775950000  | 2.5620840000  | -0.2109090000 |
| H | -7.7597630000 | 0.6654810000  | 0.7063440000  |
| H | -4.7182630000 | 3.4837600000  | 1.1515960000  |
| H | 3.1068930000  | -0.8219350000 | 0.0117420000  |
| H | -1.5934320000 | -2.3918180000 | -1.6731090000 |
| H | 0.5511200000  | 0.0677800000  | 0.3984250000  |

**Table S2:** Cartesian (X, Y, Z) coordinates of minimized structure of [(LH<sub>8</sub>)<sup>+5</sup> species of 5,5'-(2(((8-hydroxyquinolin-5-yl)methylamino)methyl)2-methylpropane-1,3-diyl)bis(azanediy)-bis - (methylene)diquinolin-8-ol, (TAME5OX)].

XYZ file of LH<sub>8</sub>: coordinates in Angstrom

|   |               |               |               |
|---|---------------|---------------|---------------|
| C | 0.8924890000  | -2.3263530000 | -0.6968260000 |
| C | 1.9556860000  | -2.4040390000 | 0.4354490000  |
| C | -0.4714910000 | -2.6634020000 | -0.0211450000 |
| C | 0.8337150000  | -0.9099050000 | -1.3497860000 |
| C | 1.2296460000  | -3.3625420000 | -1.7961650000 |
| N | -1.5067760000 | -3.1066870000 | -0.9661590000 |
| N | 3.2572060000  | -1.8153630000 | 0.0748840000  |
| N | 1.1582540000  | 0.1678460000  | -0.4012880000 |
| C | 0.9974320000  | 1.5411480000  | -0.9174560000 |
| C | 4.3288080000  | -2.0305490000 | 1.0699970000  |
| C | -2.8541000000 | -3.2961060000 | -0.3979040000 |
| C | 5.6282190000  | -1.3800830000 | 0.6490580000  |
| C | -0.4305010000 | 2.0540380000  | -0.9337720000 |
| C | -3.7568360000 | -2.0754790000 | -0.5266800000 |
| C | -3.4760980000 | -1.0946960000 | -1.4580130000 |
| C | -4.2946720000 | 0.0448330000  | -1.6133300000 |
| C | -5.4090670000 | 0.2358990000  | -0.8163860000 |
| C | -4.9401690000 | -1.9374310000 | 0.2716450000  |
| C | -5.7748970000 | -0.7709250000 | 0.1334220000  |
| N | -6.9063150000 | -0.5854850000 | 0.8847660000  |
| C | -7.2553950000 | -1.5220270000 | 1.7613570000  |
| C | -6.5120730000 | -2.7099630000 | 1.9620630000  |
| C | -5.3647050000 | -2.9112630000 | 1.2217410000  |
| C | 6.6820890000  | -2.1585450000 | 0.2031760000  |
| C | 7.9062880000  | -1.5930090000 | -0.2230090000 |
| C | 8.0886970000  | -0.2233110000 | -0.2062600000 |
| C | 5.7982680000  | 0.0445580000  | 0.6766580000  |
| C | 7.0358820000  | 0.6329200000  | 0.2486580000  |
| N | 7.2518970000  | 1.9864110000  | 0.2614670000  |
| C | 6.2787870000  | 2.7827870000  | 0.6925710000  |
| C | 5.0255230000  | 2.3003580000  | 1.1440690000  |
| C | 4.7895470000  | 0.9408440000  | 1.1323370000  |
| C | -3.0620770000 | 3.1256910000  | -1.0397610000 |
| C | -2.3129890000 | 3.0369480000  | -2.1899910000 |
| C | -0.9999680000 | 2.5028840000  | -2.1167020000 |
| C | -2.5113670000 | 2.7169380000  | 0.2089220000  |
| C | -1.2018380000 | 2.1578620000  | 0.2725000000  |
| C | -0.7609720000 | 1.7465810000  | 1.5629490000  |
| C | -1.5858800000 | 1.9183190000  | 2.6600840000  |
| C | -2.8677180000 | 2.4975780000  | 2.4914680000  |
| N | -3.3212760000 | 2.8822650000  | 1.3013060000  |
| O | -4.3800530000 | 3.5584680000  | -1.0385650000 |
| O | 9.2602820000  | 0.3841610000  | -0.6106230000 |
| O | -6.1965040000 | 1.3632150000  | -0.9005820000 |

|   |               |               |               |
|---|---------------|---------------|---------------|
| H | 1.5805880000  | -1.8558270000 | 1.3088130000  |
| H | 2.0527080000  | -3.4647590000 | 0.7392150000  |
| H | -0.2992020000 | -3.4238450000 | 0.7688550000  |
| H | -0.8305860000 | -1.7579160000 | 0.4810840000  |
| H | 1.5141310000  | -0.8850340000 | -2.2248930000 |
| H | -0.1790270000 | -0.7561720000 | -1.7374300000 |
| H | 2.2397000000  | -3.2076280000 | -2.1941760000 |
| H | 1.1806270000  | -4.3878240000 | -1.4066960000 |
| H | 0.5364330000  | -3.2739030000 | -2.6393690000 |
| H | 1.6065030000  | 2.1887700000  | -0.2712150000 |
| H | 1.4106840000  | 1.6501160000  | -1.9383880000 |
| H | 3.9754260000  | -1.6168300000 | 2.0240590000  |
| H | 4.5101500000  | -3.1059380000 | 1.2528280000  |
| H | -3.3177030000 | -4.1459210000 | -0.9206110000 |
| H | -2.7836490000 | -3.5972120000 | 0.6622930000  |
| H | -2.5917990000 | -1.2137640000 | -2.0725410000 |
| H | -4.0318180000 | 0.7899620000  | -2.3555420000 |
| H | -8.1601660000 | -1.3359580000 | 2.3331110000  |
| H | -6.8474840000 | -3.4442620000 | 2.6868740000  |
| H | -4.7869470000 | -3.8181950000 | 1.3590030000  |
| H | 6.5741800000  | -3.2392940000 | 0.1820700000  |
| H | 8.7066790000  | -2.2442220000 | -0.5636890000 |
| H | 6.4886250000  | 3.8481660000  | 0.6869980000  |
| H | 4.2713940000  | 2.9977410000  | 1.4925030000  |
| H | 3.8377770000  | 0.5453060000  | 1.4649590000  |
| H | -2.7312870000 | 3.3586770000  | -3.1362920000 |
| H | -0.4189250000 | 2.4416090000  | -3.0323860000 |
| H | 0.2033240000  | 1.2644940000  | 1.6568430000  |
| H | -1.2675730000 | 1.6068930000  | 3.6487380000  |
| H | -3.5309290000 | 2.6406730000  | 3.3380220000  |
| H | -4.6585760000 | 3.5957580000  | -0.0845960000 |
| H | 9.9190330000  | -0.2777400000 | -0.8989740000 |
| H | -5.7194210000 | 2.0953510000  | -1.3553400000 |
| H | 3.5688960000  | -2.0769200000 | -0.8586100000 |
| H | -1.2139990000 | -3.9199470000 | -1.4969190000 |
| H | 2.1122510000  | 0.0117910000  | -0.0684460000 |
| H | 8.5825830000  | 2.5663070000  | -0.2059370000 |
| H | -7.7547750000 | 0.6697040000  | 0.7113160000  |
| H | -4.7132740000 | 3.4879830000  | 1.1565680000  |
| H | 3.1118840000  | -0.8177120000 | 0.0167130000  |
| H | -1.5884440000 | -2.3875950000 | -1.6681370000 |

**Table S3:** Cartesian (X, Y, Z) coordinates of minimized structure of [(LH<sub>7</sub>)<sup>+4</sup> species of 5,5'-(2(((8-hydroxyquinolin-5-yl)methylamino)methyl)2-methylpropane-1,3-diyl)bis(azanediy)-bis - (methylene)diquinolin-8-ol, (TAME5OX)].

XYZ file of LH<sub>7</sub>: coordinates in Angstrom

|   |               |               |               |
|---|---------------|---------------|---------------|
| C | 0.8720660000  | -2.3513100000 | -0.7163960000 |
| C | 1.9352630000  | -2.4289960000 | 0.4158790000  |
| C | -0.4919140000 | -2.6883590000 | -0.0407150000 |
| C | 0.8132920000  | -0.9348620000 | -1.3693560000 |
| C | 1.2092230000  | -3.3874990000 | -1.8157350000 |
| N | -1.5271990000 | -3.1316440000 | -0.9857290000 |
| N | 3.2367830000  | -1.8403200000 | 0.0553140000  |
| N | 1.1378310000  | 0.1428890000  | -0.4208580000 |
| C | 0.9770090000  | 1.5161910000  | -0.9370260000 |
| C | 4.3083850000  | -2.0555060000 | 1.0504270000  |
| C | -2.8745230000 | -3.3210630000 | -0.4174740000 |
| C | 5.6077960000  | -1.4050400000 | 0.6294880000  |
| C | -0.4509240000 | 2.0290810000  | -0.9533420000 |
| C | -3.7772590000 | -2.1004360000 | -0.5462500000 |
| C | -3.4965210000 | -1.1196530000 | -1.4775830000 |
| C | -4.3150950000 | 0.0198760000  | -1.6329000000 |
| C | -5.4294900000 | 0.2109420000  | -0.8359560000 |
| C | -4.9605920000 | -1.9623880000 | 0.2520750000  |
| C | -5.7953200000 | -0.7958820000 | 0.1138520000  |
| N | -6.9267380000 | -0.6104420000 | 0.8651960000  |
| C | -7.2758180000 | -1.5469840000 | 1.7417870000  |
| C | -6.5324960000 | -2.7349200000 | 1.9424930000  |
| C | -5.3851280000 | -2.9362200000 | 1.2021710000  |
| C | 6.6616660000  | -2.1835020000 | 0.1836060000  |
| C | 7.8858650000  | -1.6179660000 | -0.2425790000 |
| C | 8.0682740000  | -0.2482680000 | -0.2258300000 |
| C | 5.7778450000  | 0.0196010000  | 0.6570880000  |
| C | 7.0154590000  | 0.6079630000  | 0.2290880000  |
| N | 7.2314740000  | 1.9614540000  | 0.2418970000  |
| C | 6.2583640000  | 2.7578300000  | 0.6730010000  |
| C | 5.0051000000  | 2.2754010000  | 1.1244990000  |
| C | 4.7691240000  | 0.9158870000  | 1.1127670000  |
| C | -3.0825000000 | 3.1007340000  | -1.0593310000 |
| C | -2.3334120000 | 3.0119910000  | -2.2095610000 |
| C | -1.0203910000 | 2.4779270000  | -2.1362720000 |
| C | -2.5317900000 | 2.6919810000  | 0.1893520000  |
| C | -1.2222610000 | 2.1329050000  | 0.2529300000  |
| C | -0.7813950000 | 1.7216240000  | 1.5433790000  |
| C | -1.6063030000 | 1.8933620000  | 2.6405140000  |
| C | -2.8881410000 | 2.4726210000  | 2.4718980000  |
| N | -3.3416990000 | 2.8573080000  | 1.2817360000  |
| O | -4.4004760000 | 3.5335110000  | -1.0581350000 |

|   |               |               |               |
|---|---------------|---------------|---------------|
| O | 9.2398590000  | 0.3592040000  | -0.6301930000 |
| O | -6.2169270000 | 1.3382580000  | -0.9201520000 |
| H | 1.5601650000  | -1.8807840000 | 1.2892430000  |
| H | 2.0322850000  | -3.4897160000 | 0.7196450000  |
| H | -0.3196250000 | -3.4488020000 | 0.7492850000  |
| H | -0.8510090000 | -1.7828730000 | 0.4615140000  |
| H | 1.4937080000  | -0.9099910000 | -2.2444630000 |
| H | -0.1994500000 | -0.7811290000 | -1.7570000000 |
| H | 2.2192770000  | -3.2325850000 | -2.2137460000 |
| H | 1.1602040000  | -4.4127810000 | -1.4262660000 |
| H | 0.5160100000  | -3.2988600000 | -2.6589390000 |
| H | 1.5860800000  | 2.1638130000  | -0.2907850000 |
| H | 1.3902610000  | 1.6251590000  | -1.9579580000 |
| H | 3.9550030000  | -1.6417870000 | 2.0044890000  |
| H | 4.4897270000  | -3.1308950000 | 1.2332580000  |
| H | -3.3381260000 | -4.1708780000 | -0.9401810000 |
| H | -2.8040720000 | -3.6221690000 | 0.6427230000  |
| H | -2.6122220000 | -1.2387210000 | -2.0921110000 |
| H | -4.0522410000 | 0.7650050000  | -2.3751120000 |
| H | -8.1805890000 | -1.3609150000 | 2.3135410000  |
| H | -6.8679070000 | -3.4692190000 | 2.6673040000  |
| H | -4.8073700000 | -3.8431520000 | 1.3394330000  |
| H | 6.5537570000  | -3.2642510000 | 0.1625000000  |
| H | 8.6862560000  | -2.2691790000 | -0.5832590000 |
| H | 6.4682020000  | 3.8232090000  | 0.6674280000  |
| H | 4.2509710000  | 2.9727840000  | 1.4729330000  |
| H | 3.8173540000  | 0.5203490000  | 1.4453890000  |
| H | -2.7517100000 | 3.3337200000  | -3.1558620000 |
| H | -0.4393480000 | 2.4166520000  | -3.0519560000 |
| H | 0.1829010000  | 1.2395370000  | 1.6372730000  |
| H | -1.2879960000 | 1.5819360000  | 3.6291680000  |
| H | -3.5513520000 | 2.6157160000  | 3.3184520000  |
| H | -4.6789990000 | 3.5708010000  | -0.1041660000 |
| H | 9.8986100000  | -0.3026970000 | -0.9185440000 |
| H | -5.7398440000 | 2.0703940000  | -1.3749100000 |
| H | 3.5484730000  | -2.1018770000 | -0.8781800000 |
| H | -1.2344220000 | -3.9449040000 | -1.5164890000 |
| H | 2.0918280000  | -0.0131660000 | -0.0880160000 |
| H | 8.5621600000  | 2.5413490000  | -0.2255070000 |
| H | -7.7751980000 | 0.6447460000  | 0.6917460000  |
| H | -4.7336960000 | 3.4630270000  | 1.1369980000  |
| H | 3.0914600000  | -0.8426690000 | -0.0028570000 |

**Table S4:** Cartesian (X, Y, Z) coordinates of minimized structure of [(LH<sub>6</sub>)<sup>+3</sup> species of 5,5'-(2(((8-hydroxyquinolin-5-yl)methylamino)methyl)2-methylpropane-1,3-diyl)bis(azanediy)-bis - (methylene)diquinolin-8-ol, (TAME5OX)].

XYZ file of LH<sub>6</sub>: coordinates in Angstrom

|   |               |               |               |
|---|---------------|---------------|---------------|
| C | 0.9077810000  | -2.3579550000 | -0.7161390000 |
| C | 1.9709780000  | -2.4356410000 | 0.4161360000  |
| C | -0.4561990000 | -2.6950040000 | -0.0404580000 |
| C | 0.8490070000  | -0.9415070000 | -1.3690990000 |
| C | 1.2449380000  | -3.3941440000 | -1.8154780000 |
| N | -1.4914840000 | -3.1382890000 | -0.9854720000 |
| N | 3.2724980000  | -1.8469650000 | 0.0555710000  |
| N | 1.1735460000  | 0.1362440000  | -0.4206010000 |
| C | 1.0127240000  | 1.5095460000  | -0.9367690000 |
| C | 4.3441000000  | -2.0621510000 | 1.0506840000  |
| C | -2.8388080000 | -3.3277080000 | -0.4172170000 |
| C | 5.6435110000  | -1.4116850000 | 0.6297450000  |
| C | -0.4152090000 | 2.0224360000  | -0.9530850000 |
| C | -3.7415440000 | -2.1070810000 | -0.5459930000 |
| C | -3.4608060000 | -1.1262980000 | -1.4773260000 |
| C | -4.2793800000 | 0.0132310000  | -1.6326430000 |
| C | -5.3937750000 | 0.2042970000  | -0.8356990000 |
| C | -4.9248770000 | -1.9690330000 | 0.2523320000  |
| C | -5.7596050000 | -0.8025270000 | 0.1141090000  |
| N | -6.8910230000 | -0.6170870000 | 0.8654530000  |
| C | -7.2401030000 | -1.5536290000 | 1.7420440000  |
| C | -6.4967810000 | -2.7415650000 | 1.9427500000  |
| C | -5.3494130000 | -2.9428650000 | 1.2024280000  |
| C | 6.6973810000  | -2.1901470000 | 0.1838630000  |
| C | 7.9215800000  | -1.6246110000 | -0.2423220000 |
| C | 8.1039890000  | -0.2549130000 | -0.2255730000 |
| C | 5.8135600000  | 0.0129560000  | 0.6573450000  |
| C | 7.0511740000  | 0.6013180000  | 0.2293450000  |
| N | 7.2671890000  | 1.9548090000  | 0.2421540000  |
| C | 6.2940790000  | 2.7511850000  | 0.6732580000  |
| C | 5.0408150000  | 2.2687560000  | 1.1247560000  |
| C | 4.8048390000  | 0.9092420000  | 1.1130240000  |
| C | -3.0467850000 | 3.0940890000  | -1.0590740000 |
| C | -2.2976970000 | 3.0053460000  | -2.2093040000 |
| C | -0.9846760000 | 2.4712820000  | -2.1360150000 |
| C | -2.4960750000 | 2.6853360000  | 0.1896090000  |
| C | -1.1865460000 | 2.1262600000  | 0.2531870000  |
| C | -0.7456800000 | 1.7149790000  | 1.5436360000  |
| C | -1.5705880000 | 1.8867170000  | 2.6407710000  |
| C | -2.8524260000 | 2.4659760000  | 2.4721550000  |
| N | -3.3059840000 | 2.8506630000  | 1.2819930000  |
| O | -4.3647610000 | 3.5268660000  | -1.0578780000 |

|   |               |               |               |
|---|---------------|---------------|---------------|
| O | 9.2755740000  | 0.3525590000  | -0.6299360000 |
| O | -6.1812120000 | 1.3316130000  | -0.9198950000 |
| H | 1.5958800000  | -1.8874290000 | 1.2895000000  |
| H | 2.0680000000  | -3.4963610000 | 0.7199020000  |
| H | -0.2839100000 | -3.4554470000 | 0.7495420000  |
| H | -0.8152940000 | -1.7895180000 | 0.4617710000  |
| H | 1.5294230000  | -0.9166360000 | -2.2442060000 |
| H | -0.1637350000 | -0.7877740000 | -1.7567430000 |
| H | 2.2549920000  | -3.2392300000 | -2.2134890000 |
| H | 1.1959190000  | -4.4194260000 | -1.4260090000 |
| H | 0.5517250000  | -3.3055050000 | -2.6586820000 |
| H | 1.6217950000  | 2.1571680000  | -0.2905280000 |
| H | 1.4259760000  | 1.6185140000  | -1.9577010000 |
| H | 3.9907180000  | -1.6484320000 | 2.0047460000  |
| H | 4.5254420000  | -3.1375400000 | 1.2335150000  |
| H | -3.3024110000 | -4.1775230000 | -0.9399240000 |
| H | -2.7683570000 | -3.6288140000 | 0.6429800000  |
| H | -2.5765070000 | -1.2453660000 | -2.0918540000 |
| H | -4.0165260000 | 0.7583600000  | -2.3748550000 |
| H | -8.1448740000 | -1.3675600000 | 2.3137980000  |
| H | -6.8321920000 | -3.4758640000 | 2.6675610000  |
| H | -4.7716550000 | -3.8497970000 | 1.3396900000  |
| H | 6.5894720000  | -3.2708960000 | 0.1627570000  |
| H | 8.7219710000  | -2.2758240000 | -0.5830020000 |
| H | 6.5039170000  | 3.8165640000  | 0.6676850000  |
| H | 4.2866860000  | 2.9661390000  | 1.4731900000  |
| H | 3.8530690000  | 0.5137040000  | 1.4456460000  |
| H | -2.7159950000 | 3.3270750000  | -3.1556050000 |
| H | -0.4036330000 | 2.4100070000  | -3.0516990000 |
| H | 0.2186160000  | 1.2328920000  | 1.6375300000  |
| H | -1.2522810000 | 1.5752910000  | 3.6294250000  |
| H | -3.5156370000 | 2.6090710000  | 3.3187090000  |
| H | -4.6432840000 | 3.5641560000  | -0.1039090000 |
| H | 9.9343250000  | -0.3093420000 | -0.9182870000 |
| H | -5.7041290000 | 2.0637490000  | -1.3746530000 |
| H | 3.5841880000  | -2.1085220000 | -0.8779230000 |
| H | -1.1987070000 | -3.9515490000 | -1.5162320000 |
| H | 2.1275430000  | -0.0198110000 | -0.0877590000 |
| H | 8.5978760000  | 2.5347050000  | -0.2252500000 |
| H | -7.7394830000 | 0.6381020000  | 0.6920030000  |
| H | -4.6979790000 | 3.4563900000  | 1.1372600000  |

**Table S5:** Cartesian (X, Y, Z) coordinates of minimized structure of [(LH<sub>5</sub>)<sup>+2</sup> species of 5,5'-(2(((8-hydroxyquinolin-5-yl)methylamino)methyl)2-methylpropane-1,3-diyl)bis(azanediy)-bis-(methylene)diquinolin-8-ol, (TAME5OX)].

XYZ file of LH<sub>5</sub>: coordinates in Angstrom

|   |               |               |               |
|---|---------------|---------------|---------------|
| C | 0.8489380000  | -2.3122530000 | -0.7019740000 |
| C | 1.9121350000  | -2.3899390000 | 0.4303010000  |
| C | -0.5150420000 | -2.6493020000 | -0.0262930000 |
| C | 0.7901640000  | -0.8958050000 | -1.3549340000 |
| C | 1.1860950000  | -3.3484420000 | -1.8013130000 |
| N | -1.5503270000 | -3.0925870000 | -0.9713070000 |
| N | 3.2136550000  | -1.8012630000 | 0.0697360000  |
| N | 1.1147030000  | 0.1819460000  | -0.4064360000 |
| C | 0.9538810000  | 1.5552480000  | -0.9226040000 |
| C | 4.2852570000  | -2.0164490000 | 1.0648490000  |
| C | -2.8976510000 | -3.2820060000 | -0.4030520000 |
| C | 5.5846680000  | -1.3659830000 | 0.6439100000  |
| C | -0.4740520000 | 2.0681380000  | -0.9389200000 |
| C | -3.8003870000 | -2.0613790000 | -0.5318280000 |
| C | -3.5196490000 | -1.0805960000 | -1.4631610000 |
| C | -4.3382230000 | 0.0589330000  | -1.6184780000 |
| C | -5.4526180000 | 0.2499990000  | -0.8215340000 |
| C | -4.9837200000 | -1.9233310000 | 0.2664970000  |
| C | -5.8184480000 | -0.7568250000 | 0.1282740000  |
| N | -6.9498660000 | -0.5713850000 | 0.8796180000  |
| C | -7.2989460000 | -1.5079270000 | 1.7562090000  |
| C | -6.5556240000 | -2.6958630000 | 1.9569150000  |
| C | -5.4082560000 | -2.8971630000 | 1.2165930000  |
| C | 6.6385380000  | -2.1444450000 | 0.1980280000  |
| C | 7.8627370000  | -1.5789090000 | -0.2281570000 |
| C | 8.0451460000  | -0.2092110000 | -0.2114080000 |
| C | 5.7547170000  | 0.0586580000  | 0.6715100000  |
| C | 6.9923310000  | 0.6470200000  | 0.2435100000  |
| N | 7.2083460000  | 2.0005110000  | 0.2563190000  |
| C | 6.2352360000  | 2.7968870000  | 0.6874230000  |
| C | 4.9819720000  | 2.3144580000  | 1.1389210000  |
| C | 4.7459960000  | 0.9549440000  | 1.1271890000  |
| C | -3.1056280000 | 3.1397910000  | -1.0449090000 |
| C | -2.3565400000 | 3.0510480000  | -2.1951390000 |
| C | -1.0435190000 | 2.5169840000  | -2.1218500000 |
| C | -2.5549180000 | 2.7310380000  | 0.2037740000  |
| C | -1.2453890000 | 2.1719620000  | 0.2673520000  |
| C | -0.8045230000 | 1.7606810000  | 1.5578010000  |
| C | -1.6294310000 | 1.9324190000  | 2.6549360000  |
| C | -2.9112690000 | 2.5116780000  | 2.4863200000  |
| N | -3.3648270000 | 2.8963650000  | 1.2961580000  |
| O | -4.4236040000 | 3.5725680000  | -1.0437130000 |
| O | 9.2167310000  | 0.3982610000  | -0.6157710000 |
| O | -6.2400550000 | 1.3773150000  | -0.9057300000 |

|   |               |               |               |
|---|---------------|---------------|---------------|
| H | 1.5370370000  | -1.8417270000 | 1.3036650000  |
| H | 2.0091570000  | -3.4506590000 | 0.7340670000  |
| H | -0.3427530000 | -3.4097450000 | 0.7637070000  |
| H | -0.8741370000 | -1.7438160000 | 0.4759360000  |
| H | 1.4705800000  | -0.8709340000 | -2.2300410000 |
| H | -0.2225780000 | -0.7420720000 | -1.7425780000 |
| H | 2.1961490000  | -3.1935280000 | -2.1993240000 |
| H | 1.1370760000  | -4.3737240000 | -1.4118440000 |
| H | 0.4928820000  | -3.2598030000 | -2.6445170000 |
| H | 1.5629520000  | 2.2028700000  | -0.2763630000 |
| H | 1.3671330000  | 1.6642160000  | -1.9435360000 |
| H | 3.9318750000  | -1.6027300000 | 2.0189110000  |
| H | 4.4665990000  | -3.0918380000 | 1.2476800000  |
| H | -3.3612540000 | -4.1318210000 | -0.9257590000 |
| H | -2.8272000000 | -3.5831120000 | 0.6571450000  |
| H | -2.6353500000 | -1.1996640000 | -2.0776890000 |
| H | -4.0753690000 | 0.8040620000  | -2.3606900000 |
| H | -8.2037170000 | -1.3218580000 | 2.3279630000  |
| H | -6.8910350000 | -3.4301620000 | 2.6817260000  |
| H | -4.8304980000 | -3.8040950000 | 1.3538550000  |
| H | 6.5306290000  | -3.2251940000 | 0.1769220000  |
| H | 8.6631280000  | -2.2301220000 | -0.5688370000 |
| H | 6.4450740000  | 3.8622660000  | 0.6818500000  |
| H | 4.2278430000  | 3.0118410000  | 1.4873550000  |
| H | 3.7942260000  | 0.5594060000  | 1.4598110000  |
| H | -2.7748380000 | 3.3727770000  | -3.1414400000 |
| H | -0.4624760000 | 2.4557090000  | -3.0375340000 |
| H | 0.1597730000  | 1.2785940000  | 1.6516950000  |
| H | -1.3111240000 | 1.6209930000  | 3.6435900000  |
| H | -3.5744800000 | 2.6547730000  | 3.3328740000  |
| H | -4.7021270000 | 3.6098580000  | -0.0897440000 |
| H | 9.8754820000  | -0.2636400000 | -0.9041220000 |
| H | -5.7629720000 | 2.1094510000  | -1.3604880000 |
| H | 3.5253450000  | -2.0628200000 | -0.8637580000 |
| H | -1.2575500000 | -3.9058470000 | -1.5020670000 |
| H | 2.0687000000  | 0.0258910000  | -0.0735940000 |
| H | 8.5390330000  | 2.5804070000  | -0.2110850000 |
| H | -7.7983240000 | 0.6838040000  | 0.7061670000  |

**Table S6:** Cartesian (X, Y, Z) coordinates of minimized structure of [(LH<sub>4</sub>)<sup>+</sup> species of 5,5'-(2(((8-hydroxyquinolin-5-yl)methylamino)methyl)2-methylpropane-1,3-diyl)bis(azanediy)-bis-(methylene)diquinolin-8-ol, (TAME5OX)].

XYZ file of LH<sub>4</sub>: coordinates in Angstrom

|   |               |               |               |
|---|---------------|---------------|---------------|
| C | 0.7510940000  | -2.3002160000 | -0.6929570000 |
| C | 1.8142910000  | -2.3779020000 | 0.4393180000  |
| C | -0.6128860000 | -2.6372650000 | -0.0172760000 |
| C | 0.6923200000  | -0.8837680000 | -1.3459170000 |
| C | 1.0882510000  | -3.3364050000 | -1.7922960000 |
| N | -1.6481710000 | -3.0805500000 | -0.9622900000 |
| N | 3.1158110000  | -1.7892260000 | 0.0787530000  |
| N | 1.0168590000  | 0.1939830000  | -0.3974190000 |
| C | 0.8560370000  | 1.5672850000  | -0.9135870000 |
| C | 4.1874130000  | -2.0044120000 | 1.0738660000  |
| C | -2.9954950000 | -3.2699690000 | -0.3940350000 |
| C | 5.4868240000  | -1.3539460000 | 0.6529270000  |
| C | -0.5718960000 | 2.0801750000  | -0.9299030000 |
| C | -3.8982310000 | -2.0493420000 | -0.5228110000 |
| C | -3.6174930000 | -1.0685590000 | -1.4541440000 |
| C | -4.4360670000 | 0.0709700000  | -1.6094610000 |
| C | -5.5504620000 | 0.2620360000  | -0.8125170000 |
| C | -5.0815640000 | -1.9112940000 | 0.2755140000  |
| C | -5.9162920000 | -0.7447880000 | 0.1372910000  |
| N | -7.0477100000 | -0.5593480000 | 0.8886350000  |
| C | -7.3967900000 | -1.4958900000 | 1.7652260000  |
| C | -6.6534680000 | -2.6838260000 | 1.9659320000  |
| C | -5.5061000000 | -2.8851260000 | 1.2256100000  |
| C | 6.5406940000  | -2.1324080000 | 0.2070450000  |
| C | 7.7648930000  | -1.5668720000 | -0.2191400000 |
| C | 7.9473020000  | -0.1971740000 | -0.2023910000 |
| C | 5.6568730000  | 0.0706950000  | 0.6805270000  |
| C | 6.8944870000  | 0.6590570000  | 0.2525270000  |
| N | 7.1105020000  | 2.0125480000  | 0.2653360000  |
| C | 6.1373920000  | 2.8089240000  | 0.6964400000  |
| C | 4.8841280000  | 2.3264950000  | 1.1479380000  |
| C | 4.6481520000  | 0.9669810000  | 1.1362060000  |
| C | -3.2034720000 | 3.1518280000  | -1.0358920000 |
| C | -2.4543840000 | 3.0630850000  | -2.1861220000 |
| C | -1.1413630000 | 2.5290210000  | -2.1128330000 |
| C | -2.6527620000 | 2.7430750000  | 0.2127910000  |
| C | -1.3432330000 | 2.1839990000  | 0.2763690000  |
| C | -0.9023670000 | 1.7727180000  | 1.5668180000  |
| C | -1.7272750000 | 1.9444560000  | 2.6639530000  |
| C | -3.0091130000 | 2.5237150000  | 2.4953370000  |
| N | -3.4626710000 | 2.9084020000  | 1.3051750000  |
| O | -4.5214480000 | 3.5846050000  | -1.0346960000 |
| O | 9.1188870000  | 0.4102980000  | -0.6067540000 |
| O | -6.3378990000 | 1.3893520000  | -0.8967130000 |

|   |               |               |               |
|---|---------------|---------------|---------------|
| H | 1.4391930000  | -1.8296900000 | 1.3126820000  |
| H | 1.9113130000  | -3.4386220000 | 0.7430840000  |
| H | -0.4405970000 | -3.3977080000 | 0.7727240000  |
| H | -0.9719810000 | -1.7317790000 | 0.4849530000  |
| H | 1.3727360000  | -0.8588970000 | -2.2210240000 |
| H | -0.3204220000 | -0.7300350000 | -1.7335610000 |
| H | 2.0983050000  | -3.1814910000 | -2.1903070000 |
| H | 1.0392320000  | -4.3616870000 | -1.4028270000 |
| H | 0.3950380000  | -3.2477660000 | -2.6355000000 |
| H | 1.4651080000  | 2.2149070000  | -0.2673460000 |
| H | 1.2692890000  | 1.6762530000  | -1.9345190000 |
| H | 3.8340310000  | -1.5906930000 | 2.0279280000  |
| H | 4.3687550000  | -3.0798010000 | 1.2566970000  |
| H | -3.4590980000 | -4.1197840000 | -0.9167420000 |
| H | -2.9250440000 | -3.5710750000 | 0.6661620000  |
| H | -2.7331940000 | -1.1876270000 | -2.0686720000 |
| H | -4.1732130000 | 0.8160990000  | -2.3516730000 |
| H | -8.3015610000 | -1.3098210000 | 2.3369800000  |
| H | -6.9888790000 | -3.4181250000 | 2.6907430000  |
| H | -4.9283420000 | -3.7920580000 | 1.3628720000  |
| H | 6.4327850000  | -3.2131570000 | 0.1859390000  |
| H | 8.5652840000  | -2.2180850000 | -0.5598200000 |
| H | 6.3472300000  | 3.8743030000  | 0.6908670000  |
| H | 4.1299990000  | 3.0238780000  | 1.4963720000  |
| H | 3.6963820000  | 0.5714430000  | 1.4688280000  |
| H | -2.8726820000 | 3.3848140000  | -3.1324230000 |
| H | -0.5603200000 | 2.4677460000  | -3.0285170000 |
| H | 0.0619290000  | 1.2906310000  | 1.6607120000  |
| H | -1.4089680000 | 1.6330300000  | 3.6526070000  |
| H | -3.6723240000 | 2.6668100000  | 3.3418910000  |
| H | -4.7999710000 | 3.6218950000  | -0.0807270000 |
| H | 9.7776380000  | -0.2516030000 | -0.8951050000 |
| H | -5.8608160000 | 2.1214880000  | -1.3514710000 |
| H | 3.4275010000  | -2.0507830000 | -0.8547410000 |
| H | -1.3553940000 | -3.8938100000 | -1.4930500000 |
| H | 1.9708560000  | 0.0379280000  | -0.0645770000 |
| H | 8.4411930000  | 2.5924400000  | -0.2020630000 |

**Table S7:** Cartesian (X, Y, Z) coordinates of minimized structure of [(LH<sub>3</sub>) species of 5,5'-(2(((8-hydroxyquinolin-5-yl)methylamino)methyl)2-methylpropane-1,3-diyl)bis(azanediy)-bis-(methylene)diquinolin-8-ol, (TAME5OX)].

XYZ file of LH<sub>3</sub>: coordinates in Angstrom

|   |               |               |               |
|---|---------------|---------------|---------------|
| C | 0.8550200000  | -2.2641710000 | -0.6951800000 |
| C | 1.9182170000  | -2.3418570000 | 0.4370950000  |
| C | -0.5089600000 | -2.6012200000 | -0.0194990000 |
| C | 0.7962460000  | -0.8477230000 | -1.3481400000 |
| C | 1.1921770000  | -3.3003590000 | -1.7945190000 |
| N | -1.5442450000 | -3.0445050000 | -0.9645140000 |
| N | 3.2197370000  | -1.7531810000 | 0.0765300000  |
| N | 1.1207850000  | 0.2300280000  | -0.3996410000 |
| C | 0.9599630000  | 1.6033300000  | -0.9158090000 |
| C | 4.2913390000  | -1.9683670000 | 1.0716440000  |
| C | -2.8915690000 | -3.2339240000 | -0.3962590000 |
| C | 5.5907500000  | -1.3179010000 | 0.6507050000  |
| C | -0.4679700000 | 2.1162200000  | -0.9321250000 |
| C | -3.7943050000 | -2.0132970000 | -0.5250350000 |
| C | -3.5135670000 | -1.0325140000 | -1.4563670000 |
| C | -4.3321410000 | 0.1070160000  | -1.6116840000 |
| C | -5.4465360000 | 0.2980810000  | -0.8147400000 |
| C | -4.9776380000 | -1.8752490000 | 0.2732900000  |
| C | -5.8123660000 | -0.7087430000 | 0.1350670000  |
| N | -6.9437840000 | -0.5233030000 | 0.8864110000  |
| C | -7.2928640000 | -1.4598450000 | 1.7630020000  |
| C | -6.5495420000 | -2.6477810000 | 1.9637080000  |
| C | -5.4021740000 | -2.8490810000 | 1.2233860000  |
| C | 6.6446200000  | -2.0963630000 | 0.2048230000  |
| C | 7.8688190000  | -1.5308270000 | -0.2213620000 |
| C | 8.0512280000  | -0.1611290000 | -0.2046140000 |
| C | 5.7607990000  | 0.1067400000  | 0.6783050000  |
| C | 6.9984120000  | 0.6951020000  | 0.2503030000  |
| N | 7.2144270000  | 2.0485930000  | 0.2631120000  |
| C | 6.2413160000  | 2.8449690000  | 0.6942140000  |
| C | 4.9880520000  | 2.3625400000  | 1.1457120000  |
| C | 4.7520770000  | 1.0030260000  | 1.1339810000  |
| C | -3.0995460000 | 3.1878730000  | -1.0381140000 |
| C | -2.3504570000 | 3.0991310000  | -2.1883440000 |
| C | -1.0374360000 | 2.5650670000  | -2.1150550000 |
| C | -2.5488360000 | 2.7791200000  | 0.2105690000  |
| C | -1.2393070000 | 2.2200440000  | 0.2741470000  |
| C | -0.7984410000 | 1.8087630000  | 1.5645960000  |
| C | -1.6233490000 | 1.9805000000  | 2.6617310000  |
| C | -2.9051870000 | 2.5597590000  | 2.4931150000  |
| N | -3.3587450000 | 2.9444470000  | 1.3029530000  |
| O | -4.4175220000 | 3.6206500000  | -1.0369180000 |
| O | 9.2228130000  | 0.4463430000  | -0.6089760000 |
| O | -6.2339730000 | 1.4253970000  | -0.8989360000 |

|   |               |               |               |
|---|---------------|---------------|---------------|
| H | 1.5431190000  | -1.7936450000 | 1.3104590000  |
| H | 2.0152390000  | -3.4025770000 | 0.7408610000  |
| H | -0.3366710000 | -3.3616630000 | 0.7705000000  |
| H | -0.8680550000 | -1.6957340000 | 0.4827300000  |
| H | 1.4766630000  | -0.8228510000 | -2.2232470000 |
| H | -0.2164960000 | -0.6939900000 | -1.7357840000 |
| H | 2.2022320000  | -3.1454450000 | -2.1925300000 |
| H | 1.1431580000  | -4.3256420000 | -1.4050510000 |
| H | 0.4989650000  | -3.2117200000 | -2.6377230000 |
| H | 1.5690340000  | 2.2509520000  | -0.2695680000 |
| H | 1.3732160000  | 1.7122990000  | -1.9367410000 |
| H | 3.9379570000  | -1.5546490000 | 2.0257060000  |
| H | 4.4726810000  | -3.0437560000 | 1.2544740000  |
| H | -3.3551720000 | -4.0837390000 | -0.9189660000 |
| H | -2.8211180000 | -3.5350300000 | 0.6639380000  |
| H | -2.6292670000 | -1.1515810000 | -2.0708950000 |
| H | -4.0692860000 | 0.8521450000  | -2.3538960000 |
| H | -8.1976350000 | -1.2737770000 | 2.3347560000  |
| H | -6.8849530000 | -3.3820810000 | 2.6885180000  |
| H | -4.8244160000 | -3.7560130000 | 1.3606480000  |
| H | 6.5367110000  | -3.1771120000 | 0.1837170000  |
| H | 8.6692100000  | -2.1820400000 | -0.5620420000 |
| H | 6.4511540000  | 3.9103480000  | 0.6886410000  |
| H | 4.2339230000  | 3.0599230000  | 1.4941450000  |
| H | 3.8003070000  | 0.6074880000  | 1.4666020000  |
| H | -2.7687550000 | 3.4208600000  | -3.1346450000 |
| H | -0.4563930000 | 2.5037920000  | -3.0307390000 |
| H | 0.1658550000  | 1.3266760000  | 1.6584900000  |
| H | -1.3050420000 | 1.6690740000  | 3.6503850000  |
| H | -3.5683980000 | 2.7028540000  | 3.3396690000  |
| H | -4.6960450000 | 3.6579400000  | -0.0829490000 |
| H | 9.8815640000  | -0.2155580000 | -0.8973260000 |
| H | -5.7568900000 | 2.1575330000  | -1.3536940000 |
| H | 3.5314270000  | -2.0147380000 | -0.8569640000 |
| H | -1.2514680000 | -3.8577650000 | -1.4952740000 |
| H | 2.0747820000  | 0.0739730000  | -0.0667990000 |

**Table S8:** Cartesian (X, Y, Z) coordinates of minimized structure of [(LH<sub>2</sub>)<sup>-</sup> species of 5,5'-(2(((8-hydroxyquinolin-5-yl)methylamino)methyl)2-methylpropane-1,3-diyl)bis(azanediy)-bis-(methylene)diquinolin-8-ol, (TAME5OX)].

XYZ file of LH<sub>2</sub>: coordinates in Angstrom

|   |               |               |               |
|---|---------------|---------------|---------------|
| C | 0.8875000000  | -2.3305760000 | -0.7017980000 |
| C | 1.9506970000  | -2.4082620000 | 0.4304770000  |
| C | -0.4764800000 | -2.6676250000 | -0.0261170000 |
| C | 0.8287260000  | -0.9141280000 | -1.3547580000 |
| C | 1.2246570000  | -3.3667650000 | -1.8011370000 |
| N | -1.5117650000 | -3.1109100000 | -0.9711310000 |
| N | 3.2522170000  | -1.8195860000 | 0.0699120000  |
| N | 1.1532650000  | 0.1636230000  | -0.4062600000 |
| C | 0.9924430000  | 1.5369250000  | -0.9224280000 |
| C | 4.3238190000  | -2.0347720000 | 1.0650250000  |
| C | -2.8590890000 | -3.3003290000 | -0.4028760000 |
| C | 5.6232300000  | -1.3843060000 | 0.6440860000  |
| C | -0.4354900000 | 2.0498150000  | -0.9387440000 |
| C | -3.7618250000 | -2.0797020000 | -0.5316520000 |
| C | -3.4810870000 | -1.0989190000 | -1.4629850000 |
| C | -4.2996610000 | 0.0406100000  | -1.6183020000 |
| C | -5.4140560000 | 0.2316760000  | -0.8213580000 |
| C | -4.9451580000 | -1.9416540000 | 0.2666730000  |
| C | -5.7798860000 | -0.7751480000 | 0.1284500000  |
| N | -6.9113040000 | -0.5897080000 | 0.8797940000  |
| C | -7.2603840000 | -1.5262500000 | 1.7563850000  |
| C | -6.5170620000 | -2.7141860000 | 1.9570910000  |
| C | -5.3696940000 | -2.9154860000 | 1.2167690000  |
| C | 6.6771000000  | -2.1627680000 | 0.1982040000  |
| C | 7.9012990000  | -1.5972320000 | -0.2279810000 |
| C | 8.0837080000  | -0.2275340000 | -0.2112320000 |
| C | 5.7932790000  | 0.0403350000  | 0.6716860000  |
| C | 7.0308930000  | 0.6286970000  | 0.2436860000  |
| N | 7.2469080000  | 1.9821880000  | 0.2564950000  |
| C | 6.2737980000  | 2.7785640000  | 0.6875990000  |
| C | 5.0205340000  | 2.2961350000  | 1.1390970000  |
| C | 4.7845580000  | 0.9366210000  | 1.1273650000  |
| C | -3.0670660000 | 3.1214680000  | -1.0447330000 |
| C | -2.3179780000 | 3.0327250000  | -2.1949630000 |
| C | -1.0049570000 | 2.4986610000  | -2.1216740000 |
| C | -2.5163560000 | 2.7127150000  | 0.2039500000  |
| C | -1.2068270000 | 2.1536390000  | 0.2675280000  |
| C | -0.7659610000 | 1.7423580000  | 1.5579770000  |
| C | -1.5908690000 | 1.9140960000  | 2.6551120000  |
| C | -2.8727070000 | 2.4933550000  | 2.4864960000  |
| N | -3.3262650000 | 2.8780420000  | 1.2963340000  |
| O | -4.3850420000 | 3.5542450000  | -1.0435370000 |
| O | 9.2552930000  | 0.3799380000  | -0.6155950000 |
| O | -6.2014930000 | 1.3589920000  | -0.9055540000 |

|   |               |               |               |
|---|---------------|---------------|---------------|
| H | 1.5755990000  | -1.8600500000 | 1.3038410000  |
| H | 2.0477190000  | -3.4689820000 | 0.7342430000  |
| H | -0.3041910000 | -3.4280680000 | 0.7638830000  |
| H | -0.8355750000 | -1.7621390000 | 0.4761120000  |
| H | 1.5091420000  | -0.8892570000 | -2.2298650000 |
| H | -0.1840160000 | -0.7603950000 | -1.7424020000 |
| H | 2.2347110000  | -3.2118510000 | -2.1991480000 |
| H | 1.1756380000  | -4.3920470000 | -1.4116680000 |
| H | 0.5314440000  | -3.2781260000 | -2.6443410000 |
| H | 1.6015140000  | 2.1845470000  | -0.2761870000 |
| H | 1.4056950000  | 1.6458930000  | -1.9433600000 |
| H | 3.9704370000  | -1.6210530000 | 2.0190870000  |
| H | 4.5051610000  | -3.1101610000 | 1.2478560000  |
| H | -3.3226920000 | -4.1501440000 | -0.9255830000 |
| H | -2.7886380000 | -3.6014350000 | 0.6573210000  |
| H | -2.5967880000 | -1.2179870000 | -2.0775130000 |
| H | -4.0368070000 | 0.7857390000  | -2.3605140000 |
| H | -8.1651550000 | -1.3401810000 | 2.3281390000  |
| H | -6.8524730000 | -3.4484850000 | 2.6819020000  |
| H | -4.7919360000 | -3.8224180000 | 1.3540310000  |
| H | 6.5691910000  | -3.2435170000 | 0.1770980000  |
| H | 8.7016900000  | -2.2484450000 | -0.5686610000 |
| H | 6.4836360000  | 3.8439430000  | 0.6820260000  |
| H | 4.2664050000  | 2.9935180000  | 1.4875310000  |
| H | 3.8327880000  | 0.5410830000  | 1.4599870000  |
| H | -2.7362760000 | 3.3544540000  | -3.1412640000 |
| H | -0.4239140000 | 2.4373860000  | -3.0373580000 |
| H | 0.1983350000  | 1.2602710000  | 1.6518710000  |
| H | -1.2725620000 | 1.6026700000  | 3.6437660000  |
| H | -3.5359180000 | 2.6364500000  | 3.3330500000  |
| H | -4.6635650000 | 3.5915350000  | -0.0895680000 |
| H | -5.7244100000 | 2.0911280000  | -1.3603120000 |
| H | 3.5639070000  | -2.0811430000 | -0.8635820000 |
| H | -1.2189880000 | -3.9241700000 | -1.5018910000 |
| H | 2.1072620000  | 0.0075680000  | -0.0734180000 |

**Table S9:** Cartesian (X, Y, Z) coordinates of minimized structure of [(LH)<sup>2-</sup> species of 5,5'-(2(((8-hydroxyquinolin-5-yl)methylamino)methyl)2-methylpropane-1,3-diyl)bis(azanediy)-bis-(methylene)diquinolin-8-ol, (TAME5OX)].

XYZ file of LH: coordinates in Angstrom

|   |               |               |               |
|---|---------------|---------------|---------------|
| C | 0.8486750000  | -2.2618400000 | -0.6925920000 |
| C | 1.9118720000  | -2.3395260000 | 0.4396830000  |
| C | -0.5153050000 | -2.5988890000 | -0.0169110000 |
| C | 0.7899010000  | -0.8453920000 | -1.3455520000 |
| C | 1.1858320000  | -3.2980290000 | -1.7919310000 |
| N | -1.5505900000 | -3.0421740000 | -0.9619250000 |
| N | 3.2133920000  | -1.7508500000 | 0.0791180000  |
| N | 1.1144400000  | 0.2323590000  | -0.3970540000 |
| C | 0.9536180000  | 1.6056610000  | -0.9132220000 |
| C | 4.2849940000  | -1.9660360000 | 1.0742310000  |
| C | -2.8979140000 | -3.2315930000 | -0.3936700000 |
| C | 5.5844050000  | -1.3155700000 | 0.6532920000  |
| C | -0.4743150000 | 2.1185510000  | -0.9295380000 |
| C | -3.8006500000 | -2.0109660000 | -0.5224460000 |
| C | -3.5199120000 | -1.0301830000 | -1.4537790000 |
| C | -4.3384860000 | 0.1093460000  | -1.6090960000 |
| C | -5.4528810000 | 0.3004120000  | -0.8121520000 |
| C | -4.9839830000 | -1.8729180000 | 0.2758790000  |
| C | -5.8187110000 | -0.7064120000 | 0.1376560000  |
| N | -6.9501290000 | -0.5209720000 | 0.8890000000  |
| C | -7.2992090000 | -1.4575140000 | 1.7655910000  |
| C | -6.5558870000 | -2.6454500000 | 1.9662970000  |
| C | -5.4085190000 | -2.8467500000 | 1.2259750000  |
| C | 6.6382750000  | -2.0940320000 | 0.2074100000  |
| C | 7.8624740000  | -1.5284960000 | -0.2187750000 |
| C | 8.0448830000  | -0.1587980000 | -0.2020260000 |
| C | 5.7544540000  | 0.1090710000  | 0.6808920000  |
| C | 6.9920680000  | 0.6974330000  | 0.2528920000  |
| N | 7.2080830000  | 2.0509240000  | 0.2657010000  |
| C | 6.2349730000  | 2.8473000000  | 0.6968050000  |
| C | 4.9817090000  | 2.3648710000  | 1.1483030000  |
| C | 4.7457330000  | 1.0053570000  | 1.1365710000  |
| C | -3.1058910000 | 3.1902040000  | -1.0355270000 |
| C | -2.3568030000 | 3.1014610000  | -2.1857570000 |
| C | -1.0437820000 | 2.5673970000  | -2.1124680000 |
| C | -2.5551810000 | 2.7814510000  | 0.2131560000  |
| C | -1.2456520000 | 2.2223750000  | 0.2767340000  |
| C | -0.8047860000 | 1.8110940000  | 1.5671830000  |
| C | -1.6296940000 | 1.9828320000  | 2.6643180000  |
| C | -2.9115320000 | 2.5620910000  | 2.4957020000  |
| N | -3.3650900000 | 2.9467780000  | 1.3055400000  |
| O | -4.4238670000 | 3.6229810000  | -1.0343310000 |
| O | 9.2164680000  | 0.4486740000  | -0.6063890000 |
| O | -6.2403180000 | 1.4277280000  | -0.8963480000 |

|   |               |               |               |
|---|---------------|---------------|---------------|
| H | 1.5367740000  | -1.7913140000 | 1.3130470000  |
| H | 2.0088940000  | -3.4002460000 | 0.7434490000  |
| H | -0.3430160000 | -3.3593320000 | 0.7730890000  |
| H | -0.8744000000 | -1.6934030000 | 0.4853180000  |
| H | 1.4703170000  | -0.8205210000 | -2.2206590000 |
| H | -0.2228410000 | -0.6916590000 | -1.7331960000 |
| H | 2.1958860000  | -3.1431150000 | -2.1899420000 |
| H | 1.1368130000  | -4.3233110000 | -1.4024620000 |
| H | 0.4926190000  | -3.2093900000 | -2.6351350000 |
| H | 1.5626890000  | 2.2532830000  | -0.2669810000 |
| H | 1.3668700000  | 1.7146290000  | -1.9341540000 |
| H | 3.9316120000  | -1.5523170000 | 2.0282930000  |
| H | 4.4663360000  | -3.0414250000 | 1.2570620000  |
| H | -3.3615170000 | -4.0814080000 | -0.9163770000 |
| H | -2.8274630000 | -3.5326990000 | 0.6665270000  |
| H | -2.6356130000 | -1.1492510000 | -2.0683070000 |
| H | -4.0756320000 | 0.8544750000  | -2.3513080000 |
| H | -8.2039800000 | -1.2714450000 | 2.3373450000  |
| H | -6.8912980000 | -3.3797490000 | 2.6911080000  |
| H | -4.8307610000 | -3.7536820000 | 1.3632370000  |
| H | 6.5303660000  | -3.1747810000 | 0.1863040000  |
| H | 8.6628650000  | -2.1797090000 | -0.5594550000 |
| H | 6.4448110000  | 3.9126790000  | 0.6912320000  |
| H | 4.2275800000  | 3.0622540000  | 1.4967370000  |
| H | 3.7939630000  | 0.6098190000  | 1.4691930000  |
| H | -2.7751010000 | 3.4231900000  | -3.1320580000 |
| H | -0.4627390000 | 2.5061220000  | -3.0281520000 |
| H | 0.1595100000  | 1.3290070000  | 1.6610770000  |
| H | -1.3113870000 | 1.6714060000  | 3.6529720000  |
| H | -3.5747430000 | 2.7051860000  | 3.3422560000  |
| H | -5.7632350000 | 2.1598640000  | -1.3511060000 |
| H | 3.5250820000  | -2.0124070000 | -0.8543760000 |
| H | -1.2578130000 | -3.8554340000 | -1.4926850000 |
| H | 2.0684370000  | 0.0763040000  | -0.0642120000 |

**Table S10:** Cartesian (X, Y, Z) coordinates of minimized structure of [(L)<sup>3-</sup> species of 5,5'-(2(((8-hydroxyquinolin-5-yl)methylamino)methyl)2-methylpropane-1,3-diyl)bis(azanediy)-bis-(methylene)diquinolin-8-ol, (TAME5OX)].

XYZ file of L: coordinates in Angstrom

|   |               |               |               |
|---|---------------|---------------|---------------|
| C | 0.8486750000  | -2.2618400000 | -0.6925920000 |
| C | 1.9118720000  | -2.3395260000 | 0.4396830000  |
| C | -0.5153050000 | -2.5988890000 | -0.0169110000 |
| C | 0.7899010000  | -0.8453920000 | -1.3455520000 |
| C | 1.1858320000  | -3.2980290000 | -1.7919310000 |
| N | -1.5505900000 | -3.0421740000 | -0.9619250000 |
| N | 3.2133920000  | -1.7508500000 | 0.0791180000  |
| N | 1.1144400000  | 0.2323590000  | -0.3970540000 |
| C | 0.9536180000  | 1.6056610000  | -0.9132220000 |
| C | 4.2849940000  | -1.9660360000 | 1.0742310000  |
| C | -2.8979140000 | -3.2315930000 | -0.3936700000 |
| C | 5.5844050000  | -1.3155700000 | 0.6532920000  |
| C | -0.4743150000 | 2.1185510000  | -0.9295380000 |
| C | -3.8006500000 | -2.0109660000 | -0.5224460000 |
| C | -3.5199120000 | -1.0301830000 | -1.4537790000 |
| C | -4.3384860000 | 0.1093460000  | -1.6090960000 |
| C | -5.4528810000 | 0.3004120000  | -0.8121520000 |
| C | -4.9839830000 | -1.8729180000 | 0.2758790000  |
| C | -5.8187110000 | -0.7064120000 | 0.1376560000  |
| N | -6.9501290000 | -0.5209720000 | 0.8890000000  |
| C | -7.2992090000 | -1.4575140000 | 1.7655910000  |
| C | -6.5558870000 | -2.6454500000 | 1.9662970000  |
| C | -5.4085190000 | -2.8467500000 | 1.2259750000  |
| C | 6.6382750000  | -2.0940320000 | 0.2074100000  |
| C | 7.8624740000  | -1.5284960000 | -0.2187750000 |
| C | 8.0448830000  | -0.1587980000 | -0.2020260000 |
| C | 5.7544540000  | 0.1090710000  | 0.6808920000  |
| C | 6.9920680000  | 0.6974330000  | 0.2528920000  |
| N | 7.2080830000  | 2.0509240000  | 0.2657010000  |
| C | 6.2349730000  | 2.8473000000  | 0.6968050000  |
| C | 4.9817090000  | 2.3648710000  | 1.1483030000  |
| C | 4.7457330000  | 1.0053570000  | 1.1365710000  |
| C | -3.1058910000 | 3.1902040000  | -1.0355270000 |
| C | -2.3568030000 | 3.1014610000  | -2.1857570000 |
| C | -1.0437820000 | 2.5673970000  | -2.1124680000 |
| C | -2.5551810000 | 2.7814510000  | 0.2131560000  |
| C | -1.2456520000 | 2.2223750000  | 0.2767340000  |
| C | -0.8047860000 | 1.8110940000  | 1.5671830000  |
| C | -1.6296940000 | 1.9828320000  | 2.6643180000  |
| C | -2.9115320000 | 2.5620910000  | 2.4957020000  |
| N | -3.3650900000 | 2.9467780000  | 1.3055400000  |
| O | -4.4238670000 | 3.6229810000  | -1.0343310000 |
| O | 9.2164680000  | 0.4486740000  | -0.6063890000 |
| O | -6.2403180000 | 1.4277280000  | -0.8963480000 |

|   |               |               |               |
|---|---------------|---------------|---------------|
| H | 1.5367740000  | -1.7913140000 | 1.3130470000  |
| H | 2.0088940000  | -3.4002460000 | 0.7434490000  |
| H | -0.3430160000 | -3.3593320000 | 0.7730890000  |
| H | -0.8744000000 | -1.6934030000 | 0.4853180000  |
| H | 1.4703170000  | -0.8205210000 | -2.2206590000 |
| H | -0.2228410000 | -0.6916590000 | -1.7331960000 |
| H | 2.1958860000  | -3.1431150000 | -2.1899420000 |
| H | 1.1368130000  | -4.3233110000 | -1.4024620000 |
| H | 0.4926190000  | -3.2093900000 | -2.6351350000 |
| H | 1.5626890000  | 2.2532830000  | -0.2669810000 |
| H | 1.3668700000  | 1.7146290000  | -1.9341540000 |
| H | 3.9316120000  | -1.5523170000 | 2.0282930000  |
| H | 4.4663360000  | -3.0414250000 | 1.2570620000  |
| H | -3.3615170000 | -4.0814080000 | -0.9163770000 |
| H | -2.8274630000 | -3.5326990000 | 0.6665270000  |
| H | -2.6356130000 | -1.1492510000 | -2.0683070000 |
| H | -4.0756320000 | 0.8544750000  | -2.3513080000 |
| H | -8.2039800000 | -1.2714450000 | 2.3373450000  |
| H | -6.8912980000 | -3.3797490000 | 2.6911080000  |
| H | -4.8307610000 | -3.7536820000 | 1.3632370000  |
| H | 6.5303660000  | -3.1747810000 | 0.1863040000  |
| H | 8.6628650000  | -2.1797090000 | -0.5594550000 |
| H | 6.4448110000  | 3.9126790000  | 0.6912320000  |
| H | 4.2275800000  | 3.0622540000  | 1.4967370000  |
| H | 3.7939630000  | 0.6098190000  | 1.4691930000  |
| H | -2.7751010000 | 3.4231900000  | -3.1320580000 |
| H | -0.4627390000 | 2.5061220000  | -3.0281520000 |
| H | 0.1595100000  | 1.3290070000  | 1.6610770000  |
| H | -1.3113870000 | 1.6714060000  | 3.6529720000  |
| H | -3.5747430000 | 2.7051860000  | 3.3422560000  |
| H | 3.5250820000  | -2.0124070000 | -0.8543760000 |
| H | -1.2578130000 | -3.8554340000 | -1.4926850000 |
| H | 2.0684370000  | 0.0763040000  | -0.0642120000 |

**Table S11:** Theoretically calculated energies (Hartrees) of  $(\text{LH}_9)^{+6}$ ,  $(\text{LH}_8)^{+5}$ ,  $(\text{LH}_7)^{+4}$ ,  $(\text{LH}_6)^{+3}$ ,  $(\text{LH}_5)^{+2}$ ,  $(\text{LH}_4)^{+1}$ ,  $(\text{LH}_3)$ ,  $(\text{LH}_2)^{-1}$ ,  $(\text{LH})^{-2}$  and  $(\text{L})^{-3}$  of TAME5OX.

| Species                     | Total energy   | Dispersion energy | Dispersion corrected energy |
|-----------------------------|----------------|-------------------|-----------------------------|
| $(\text{H}_9\text{L})^{6+}$ | -1969.02992149 | -0.11561753       | -1969.14553902              |
| $(\text{H}_8\text{L})^{5+}$ | -1968.43339077 | -0.11206523       | -1968.54545600              |
| $(\text{H}_7\text{L})^{4+}$ | -1968.14844068 | -0.10944861       | -1968.25788929              |
| $(\text{H}_6\text{L})^{3+}$ | -1968.14844066 | -0.10626730       | -1968.25470896              |
| $(\text{H}_5\text{L})^{2+}$ | -1968.14797797 | -0.10343338       | -1968.25141195              |
| $(\text{H}_4\text{L})^+$    | -1968.14797795 | -0.10096540       | -1968.24894335              |
| $(\text{H}_3\text{L})$      | -1968.14352995 | -0.09862247       | -1968.24215242              |
| $(\text{H}_2\text{L})^-$    | -1968.14352992 | -0.09798300       | -1968.24151302              |
| $(\text{HL})^{2-}$          | -1967.91875902 | -0.09673875       | -1968.01549887              |
| $(\text{L})^{3-}$           | -1967.70686613 | -0.09531566       | -1967.80218279              |

\*Dispersion correction for the B3LYP functional was carried out with zero-damping, using DFTD3 V2.1 Rev 6 S. Grimme, University Muenster and coordinates from the B3LYP/ 6-31 G\* optimised structures.
